# Supplementary material for: Atractylone in the Atractylodes macrocephala Rhizoma Essential Oil and Its Anti-Inflammatory Activity
Source: MDPI journal article supplement (doi:10.3390/molecules28217340), 2023-10-30
Supplement: s1 [file s1]

Supplementary Materials

Atractylone in the *Atractylodes macrocephala* Rhizoma Essential Oil and Its Anti-Inflammatory Activity

Supplementary Tables

Supplementary Table S1. Disease Activity Index (DAI) scoring Criteria

| Score | Weight loss (%) | Feces state  | Occult blood test               |
|-------|-----------------|--------------|---------------------------------|
| 0     | 0               | Normal stool | Negative                        |
| 1     | 1-5             | Soft stool   | Slight positive                 |
| 2     | 6-10            | Loose stool  | Positive                        |
| 3     | 11-15           | Watery stool | Strong positive                 |
| 4     | >15             | Diarrhea     | Bloody stool with the naked eye |

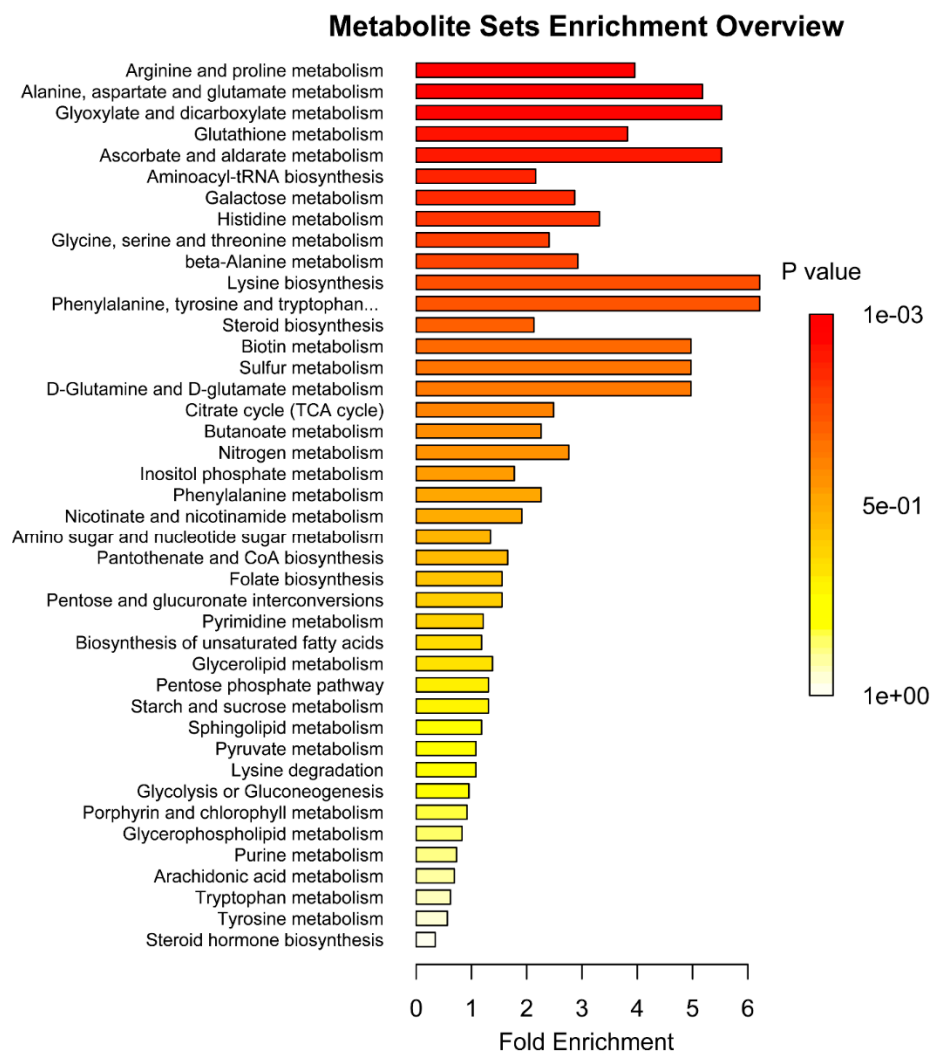

Figure S1. Enrichment analysis of over-representation analysis.
